# Supplementary material for: Evolutionary dynamics of the chloroplast genome sequences of six Colobanthus species
Source: PubMed Central journal article supplement (PMC7359349; doi:10.1038/s41598-020-68563-5), 2020-07-13

## **Evolutionary dynamics of the chloroplast genome sequences of six *Colobanthus* species**

Piotr Androsiuk\*<sup>1</sup>, Jan Paweł Jastrzębski<sup>1</sup>, Łukasz Pauksto<sup>1</sup>, Karol Makowczenko<sup>1</sup>, Adam Okorski<sup>2</sup>, Agnieszka Pszczółkowska<sup>2</sup>, Katarzyna Joanna Chwedorzewska<sup>3</sup>, Ryszard Górecki<sup>1</sup>, Irena Giełwanowska<sup>1</sup>

1. Department of Plant Physiology, Genetics and Biotechnology, University of Warmia and Mazury in Olsztyn, ul. M. Oczapowskiego 1A, 10-719 Olsztyn, Poland.
- 2 Department of Entomology, Phytopathology and Molecular Diagnostics, University of Warmia and Mazury in Olsztyn, ul. Prawocheńskiego 17, 10-720 Olsztyn, Poland.
- 3 Department of Agronomy, Warsaw University of Life Sciences-SGGW, ul. Nowoursynowska 166, 02-787 Warszawa, Poland.

**Figure S1.** A MAUVE alignment of *C. acicularis*, *C. affinis*, *C. apetalus*, *C. lycopodioides*, *C. nivicola*, *C. pulvinatus*, *C. subulatus* and *C. quitensis* chloroplast genomes showing the lack of rearrangements between the chloroplast genomes of the eight species. The *C. quitensis* genome is shown at top as the reference. Within each of the alignment, local collinear blocks are represented by blocks of the same color connected by lines.

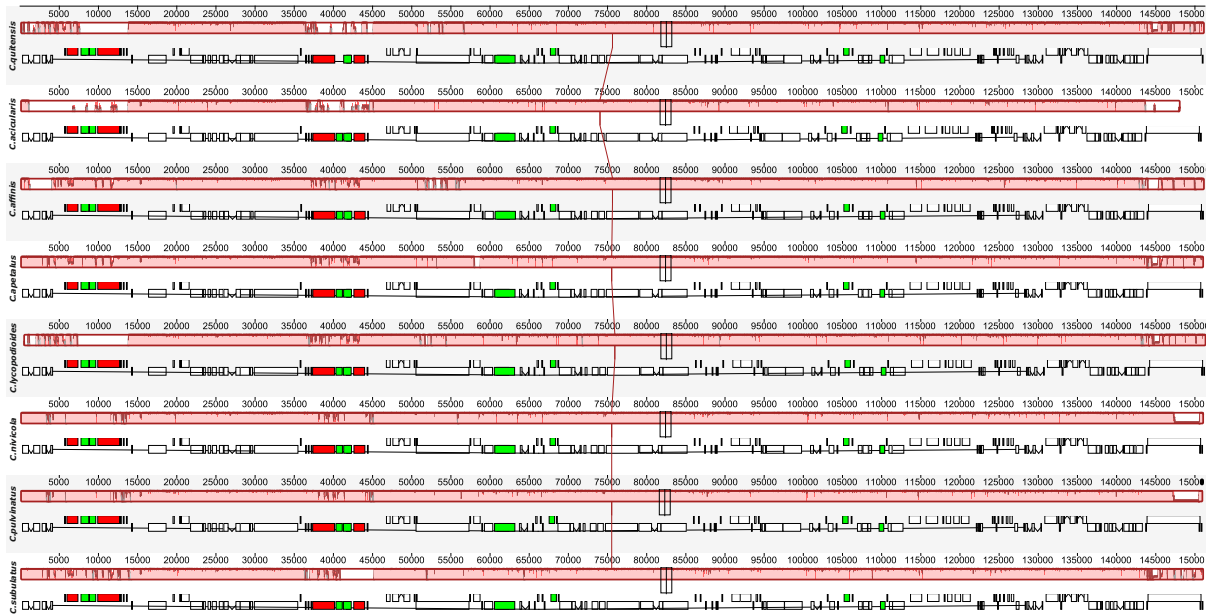

Supplement: 41598_2020_68563_MOESM1_ESM.pdf [file 41598_2020_68563_MOESM1_ESM.pdf]
