# Supplementary material for: Evolutionary dynamics of the chloroplast genome sequences of six Colobanthus species
Source: PubMed Central journal article supplement (PMC7359349; doi:10.1038/s41598-020-68563-5), 2020-07-13
Supplement: 41598_2020_68563_MOESM3_ESM.pdf [file 41598_2020_68563_MOESM3_ESM.pdf]

## **Evolutionary dynamics of the chloroplast genome sequences of six *Colobanthus* species**

Piotr Androsiuk\*<sup>1</sup>, Jan Paweł Jastrzębski<sup>1</sup>, Łukasz Pauksto<sup>1</sup>, Karol Makowczenko<sup>1</sup>, Adam Okorski<sup>2</sup>, Agnieszka Pszczółkowska<sup>2</sup>, Katarzyna Joanna Chwedorzewska<sup>3</sup>, Ryszard Górecki<sup>1</sup>, Irena Giełwanowska<sup>1</sup>

1. Department of Plant Physiology, Genetics and Biotechnology, Faculty of Biology and Biotechnology, University of Warmia and Mazury in Olsztyn, ul. M. Oczapowskiego 1A, 10-719 Olsztyn, Poland.
2. Department of Entomology, Phytopathology and Molecular Diagnostics, Faculty of Environmental Management and Agriculture, University of Warmia and Mazury in Olsztyn, ul. Prawocheńskiego 17, 10-720 Olsztyn, Poland.
3. Department of Agronomy, Warsaw University of Life Sciences-SGGW, ul. Nowoursynowska 166, 02-787 Warszawa, Poland.

**Table. S2A.** List of repeated sequences in the chloroplast genome of *Colobanthus acicularis*

| Repeat length (bp) | Strat site of repeat A | Repeat A location                | Repeat A region | Strat site of repeat B | Repeat B location                | Repeat B region | Repeat type |
|--------------------|------------------------|----------------------------------|-----------------|------------------------|----------------------------------|-----------------|-------------|
| 30                 | 23989                  | IGS ( <i>psaC-ndhE</i> )         | SSC             | 24014                  | <i>ndhE</i>                      | SSC             | F           |
| 30                 | 52308                  | <i>ycf2</i>                      | IR              | 52350                  | <i>ycf2</i>                      | IR              | F           |
| 30                 | 52310                  | <i>ycf2</i>                      | IR              | 52328                  | <i>ycf2</i>                      | IR              | F           |
| 30                 | 66785                  | <i>trnS-GCU</i>                  | LSC             | 93269                  | <i>trnS-UGA</i>                  | LSC             | F           |
| 30                 | 66785                  | <i>trnS-GCU</i>                  | LSC             | 102808                 | <i>trnS-GGA</i>                  | LSC             | P           |
| 30                 | 87815                  | IGS ( <i>psbM-trnD-GUC</i> )     | LSC             | 89204                  | IGS ( <i>trnE-UUC-trnT-GGU</i> ) | LSC             | F           |
| 30                 | 87816                  | IGS ( <i>psbM-trnD-GUC</i> )     | LSC             | 87819                  | IGS ( <i>psbM-trnD-GUC</i> )     | LSC             | F           |
| 30                 | 87818                  | IGS ( <i>psbM-trnD-GUC</i> )     | LSC             | 87818                  | IGS ( <i>psbM-trnD-GUC</i> )     | LSC             | R           |
| 30                 | 87818                  | IGS ( <i>psbM-trnD-GUC</i> )     | LSC             | 87819                  | IGS ( <i>psbM-trnD-GUC</i> )     | LSC             | F           |
| 30                 | 87818                  | IGS ( <i>psbM-trnD-GUC</i> )     | LSC             | 129669                 | <i>clpP</i> (intron1)            | LSC             | R           |
| 30                 | 87818                  | IGS ( <i>psbM-trnD-GUC</i> )     | LSC             | 129669                 | <i>clpP</i> (intron1)            | LSC             | F           |
| 30                 | 87819                  | IGS ( <i>psbM-trnD-GUC</i> )     | LSC             | 87819                  | IGS ( <i>psbM-trnD-GUC</i> )     | LSC             | R           |
| 30                 | 93269                  | <i>trnS-UGA</i>                  | LSC             | 102808                 | <i>trnS-GGA</i>                  | LSC             | P           |
| 30                 | 96444                  | <i>psaB</i>                      | LSC             | 98668                  | <i>psaA</i>                      | LSC             | F           |
| 30                 | 100169                 | IGS ( <i>psaA-ycf3</i> )         | LSC             | 118169                 | <i>ycf4</i>                      | LSC             | P           |
| 30                 | 100309                 | IGS ( <i>psaA-ycf3</i> )         | LSC             | 118030                 | IGS ( <i>psaI-ycf4</i> )         | LSC             | P           |
| 31                 | 52331                  | <i>ycf2</i>                      | IR              | 52355                  | <i>ycf2</i>                      | IR              | F           |
| 31                 | 68397                  | <i>trnG-UCC</i>                  | LSC             | 94203                  | <i>trnG-GCC</i>                  | LSC             | F           |
| 31                 | 87815                  | IGS ( <i>psbM-trnD-GUC</i> )     | LSC             | 129668                 | <i>clpP</i> (intron1)            | LSC             | F           |
| 31                 | 87816                  | IGS ( <i>psbM-trnD-GUC</i> )     | LSC             | 87818                  | IGS ( <i>psbM-trnD-GUC</i> )     | LSC             | F           |
| 31                 | 87818                  | IGS ( <i>psbM-trnD-GUC</i> )     | LSC             | 87818                  | IGS ( <i>psbM-trnD-GUC</i> )     | LSC             | R           |
| 31                 | 87819                  | IGS ( <i>psbM-trnD-GUC</i> )     | LSC             | 129668                 | <i>clpP</i> (intron1)            | LSC             | R           |
| 31                 | 87819                  | IGS ( <i>psbM-trnD-GUC</i> )     | LSC             | 129669                 | <i>clpP</i> (intron1)            | LSC             | F           |
| 31                 | 89203                  | IGS ( <i>trnE-UUC-trnT-GGU</i> ) | LSC             | 129667                 | <i>clpP</i> (intron1)            | LSC             | F           |
| 38                 | 87187                  | IGS ( <i>petN-psbM</i> )         | LSC             | 87187                  | IGS ( <i>petN-psbM</i> )         | LSC             | P           |
| 40                 | 26624                  | <i>ndhA</i> (intron)             | SSC             | 45872                  | IGS ( <i>trnV-GAC-rps7</i> )     | IR              | P           |
| 41                 | 33205                  | <i>ycf1</i>                      | SSC             | 33205                  | <i>ycf1</i>                      | SSC             | R           |
| 141                | 100198                 | IGS ( <i>psaA-ycf3</i> )         | LSC             | 118030                 | IGS ( <i>psaI-ycf4</i> )         | LSC             | P           |

IGS (*psaC-ndhE*) means spacer between *psaC* and *ndhE*, P means palindromic match, F means forward (direct) match and R means reverse match

**Table S2B.** List of repeated sequences in the chloroplast genome of *Colobanthus affinis*

| Repeat length (bp) | Strat site of repeat A | Repeat A location                | Repeat A region | Strat site of repeat B | Repeat B location                | Repeat B region | Repeat type |
|--------------------|------------------------|----------------------------------|-----------------|------------------------|----------------------------------|-----------------|-------------|
| 30                 | 26881                  | <i>ndhA</i> (intron)             | SSC             | 26892                  | <i>ndhA</i> (intron)             | SSC             | R           |
| 30                 | 52356                  | <i>ycf2</i>                      | IR              | 52374                  | <i>ycf2</i>                      | IR              | F           |
| 30                 | 52354                  | <i>ycf2</i>                      | IR              | 52396                  | <i>ycf2</i>                      | IR              | F           |
| 30                 | 63572                  | IGS ( <i>trnK-UUU-rps16</i> )    | LSC             | 63576                  | IGS ( <i>trnK-UUU-rps16</i> )    | LSC             | F           |
| 30                 | 89089                  | IGS ( <i>trnE-UUC-trnT-GGU</i> ) | LSC             | 89121                  | IGS ( <i>trnE-UUC-trnT-GGU</i> ) | LSC             | F           |
| 30                 | 66850                  | <i>trnS-GCU</i>                  | LSC             | 93527                  | <i>trnS-UGA</i>                  | LSC             | F           |
| 30                 | 96696                  | <i>psaB</i>                      | LSC             | 98920                  | <i>psaA</i>                      | LSC             | F           |
| 30                 | 66850                  | <i>trnS-GCU</i>                  | LSC             | 103088                 | <i>trnS-GGA</i>                  | LSC             | P           |
| 30                 | 93527                  | <i>trnS-UGA</i>                  | LSC             | 103088                 | <i>trnS-GGA</i>                  | LSC             | P           |
| 31                 | 52377                  | <i>ycf2</i>                      | IR              | 52401                  | <i>ycf2</i>                      | IR              | F           |
| 31                 | 63572                  | IGS ( <i>trnK-UUU-rps16</i> )    | LSC             | 66696                  | IGS ( <i>psbI-trnS-GCU</i> )     | LSC             | P           |
| 31                 | 68460                  | <i>trnG-UCC</i>                  | LSC             | 94460                  | <i>trnG-GCC</i>                  | LSC             | F           |
| 32                 | 63572                  | IGS ( <i>trnK-UUU-rps16</i> )    | LSC             | 63574                  | IGS ( <i>trnK-UUU-rps16</i> )    | LSC             | F           |
| 34                 | 89077                  | IGS ( <i>trnE-UUC-trnT-GGU</i> ) | LSC             | 89109                  | IGS ( <i>trnE-UUC-trnT-GGU</i> ) | LSC             | F           |
| 38                 | 87263                  | IGS ( <i>petN-psbM</i> )         | LSC             | 87263                  | IGS ( <i>petN-psbM</i> )         | LSC             | P           |
| 40                 | 26641                  | <i>ndhA</i> (intron)             | SSC             | 45918                  | IGS ( <i>trnV-GAC-rps7</i> )     | IR              | P           |
| 41                 | 19979                  | IGS ( <i>rpl32-trnL-UAG</i> )    | SSC             | 20034                  | IGS ( <i>rpl32-trnL-UAG</i> )    | SSC             | F           |
| 41                 | 33244                  | <i>ycf1</i>                      | SSC             | 33244                  | <i>ycf1</i>                      | SSC             | R           |
| 61                 | 19959                  | IGS ( <i>rpl32-trnL-UAG</i> )    | SSC             | 20014                  | IGS ( <i>rpl32-trnL-UAG</i> )    | SSC             | F           |
| 103                | 100519                 | IGS ( <i>psaA-ycf3</i> )         | LSC             | 118296                 | IGS ( <i>psaI-ycf4</i> )         | LSC             | P           |
| 134                | 100488                 | IGS ( <i>psaA-ycf3</i> )         | LSC             | 118296                 | IGS ( <i>psaI-ycf4</i> )         | LSC             | P           |
| 169                | 100453                 | IGS ( <i>psaA-ycf3</i> )         | LSC             | 118296                 | IGS ( <i>psaI-ycf4</i> )         | LSC             | P           |

IGS (*trnK-UUU-rps16*) means spacer between *trnK-UUU* and *rps16*, P means palindromic match, F means forward (direct) match and R means reverse match

**Table S2C.** List of repeated sequences in the chloroplast genome of *Colobanthus lycopodioides*

| Repeat length (bp) | Strat site of repeat A | Repeat A location             | Repeat A region | Strat site of repeat B | Repeat B location             | Repeat B region | Repeat type |
|--------------------|------------------------|-------------------------------|-----------------|------------------------|-------------------------------|-----------------|-------------|
| 30                 | 52273                  | <i>ycf2</i>                   | IR              | 52315                  | <i>ycf2</i>                   | IR              | F           |
| 30                 | 52275                  | <i>ycf2</i>                   | IR              | 52293                  | <i>ycf2</i>                   | IR              | F           |
| 30                 | 63516                  | IGS ( <i>trnK-UUU-rps16</i> ) | LSC             | 63518                  | IGS ( <i>trnK-UUU-rps16</i> ) | LSC             | F           |
| 30                 | 63516                  | IGS ( <i>trnK-UUU-rps16</i> ) | LSC             | 63520                  | IGS ( <i>trnK-UUU-rps16</i> ) | LSC             | F           |
| 30                 | 63615                  | IGS ( <i>trnK-UUU-rps16</i> ) | LSC             | 110958                 | IGS ( <i>trnM-CAU-atpE</i> )  | LSC             | P           |
| 30                 | 63615                  | IGS ( <i>trnK-UUU-rps16</i> ) | LSC             | 130085                 | <i>clpP</i> (intron1)         | LSC             | F           |
| 30                 | 66856                  | <i>trnS-GCU</i>               | LSC             | 93695                  | <i>trnS-UGA</i>               | LSC             | F           |
| 30                 | 66856                  | <i>trnS-GCU</i>               | LSC             | 103222                 | <i>trnS-GGA</i>               | LSC             | P           |
| 30                 | 93695                  | <i>trnS-UGA</i>               | LSC             | 103222                 | <i>trnS-GGA</i>               | LSC             | P           |
| 30                 | 96869                  | <i>psaB</i>                   | LSC             | 99093                  | <i>psaA</i>                   | LSC             | F           |
| 30                 | 100720                 | IGS ( <i>psaA-ycf3</i> )      | LSC             | 118440                 | IGS ( <i>psaI-ycf4</i> )      | LSC             | P           |
| 30                 | 122218                 | IGS ( <i>petA-psbJ</i> )      | LSC             | 122219                 | IGS ( <i>petA-psbJ</i> )      | LSC             | F           |
| 31                 | 52296                  | <i>ycf2</i>                   | IR              | 52320                  | <i>ycf2</i>                   | IR              | F           |
| 31                 | 68472                  | <i>trnG-UCC</i>               | LSC             | 94640                  | <i>trnG-GCC</i>               | LSC             | F           |
| 31                 | 71794                  | IGS ( <i>atpF-atpH</i> )      | LSC             | 71834                  | IGS ( <i>atpF-atpH</i> )      | LSC             | P           |
| 38                 | 87379                  | IGS ( <i>petN-psbM</i> )      | LSC             | 87379                  | IGS ( <i>petN-psbM</i> )      | LSC             | P           |
| 40                 | 26595                  | <i>ndhA</i> (intron)          | SSC             | 45837                  | IGS ( <i>trnV-GAC-rps7</i> )  | IR              | P           |
| 41                 | 33164                  | <i>ycf1</i>                   | SSC             | 33164                  | <i>ycf1</i>                   | SSC             | R           |
| 42                 | 63403                  | IGS ( <i>trnK-UUU-rps16</i> ) | LSC             | 63443                  | IGS ( <i>trnK-UUU-rps16</i> ) | LSC             | F           |
| 134                | 100616                 | IGS ( <i>psaA-ycf3</i> )      | LSC             | 118440                 | IGS ( <i>psaI-ycf4</i> )      | LSC             | P           |
| 169                | 100581                 | IGS ( <i>psaA-ycf3</i> )      | LSC             | 118440                 | IGS ( <i>psaI-ycf4</i> )      | LSC             | P           |

IGS (*trnK-UUU-rps16*) means spacer between *trnK-UUU* and *rps16*, P means palindromic match, F means forward (direct) match and R means reverse match

**Table S2D.** List of repeated sequences in the chloroplast genome of *Colobanthus nivicola*

| Repeat length (bp) | Strat site of repeat A | Repeat A location                | Repeat A region | Strat site of repeat B | Repeat B location                | Repeat B region | Repeat type |
|--------------------|------------------------|----------------------------------|-----------------|------------------------|----------------------------------|-----------------|-------------|
| 30                 | 19876                  | IGS ( <i>rpl32-trnL-UAG</i> )    | SSC             | 19897                  | IGS ( <i>rpl32-trnL-UAG</i> )    | SSC             | F           |
| 30                 | 52316                  | <i>ycf2</i>                      | IR              | 52334                  | <i>ycf2</i>                      | IR              | F           |
| 30                 | 52314                  | <i>ycf2</i>                      | IR              | 52356                  | <i>ycf2</i>                      | IR              | F           |
| 30                 | 89058                  | IGS ( <i>trnE-UUC-trnT-GGU</i> ) | LSC             | 89090                  | IGS ( <i>trnE-UUC-trnT-GGU</i> ) | LSC             | F           |
| 30                 | 66802                  | <i>trnS-GCU</i>                  | LSC             | 93487                  | <i>trnS-UGA</i>                  | LSC             | F           |
| 30                 | 96649                  | <i>psaB</i>                      | LSC             | 98873                  | <i>psaA</i>                      | LSC             | F           |
| 30                 | 66802                  | <i>trnS-GCU</i>                  | LSC             | 103043                 | <i>trnS-GGA</i>                  | LSC             | P           |
| 30                 | 93487                  | <i>trnS-UGA</i>                  | LSC             | 103043                 | <i>trnS-GGA</i>                  | LSC             | P           |
| 30                 | 110793                 | IGS ( <i>trnM-CAU-atpE</i> )     | LSC             | 110793                 | IGS ( <i>trnM-CAU-atpE</i> )     | LSC             | R           |
| 30                 | 74728                  | IGS ( <i>rps2-rpoC2</i> )        | LSC             | 110794                 | IGS ( <i>trnM-CAU-atpE</i> )     | LSC             | F           |
| 31                 | 52337                  | <i>ycf2</i>                      | IR              | 52361                  | <i>ycf2</i>                      | IR              | F           |
| 31                 | 63536                  | IGS ( <i>trnK-UUU-ndhA</i> )     | LSC             | 63540                  | IGS ( <i>trnK-UUU-ndhA</i> )     | LSC             | F           |
| 31                 | 87862                  | IGS ( <i>psbB-trnD-GUC</i> )     | LSC             | 87862                  | IGS ( <i>psbB-trnD-GUC</i> )     | LSC             | R           |
| 31                 | 68413                  | <i>trnG-UCC</i>                  | LSC             | 94420                  | <i>trnG-GCC</i>                  | LSC             | F           |
| 33                 | 63536                  | IGS ( <i>trnK-UUU-ndhA</i> )     | LSC             | 63538                  | IGS ( <i>trnK-UUU-ndhA</i> )     | LSC             | F           |
| 34                 | 89046                  | IGS ( <i>trnE-UUC-trnT-GGU</i> ) | LSC             | 89078                  | IGS ( <i>trnE-UUC-trnT-GGU</i> ) | LSC             | F           |
| 38                 | 87230                  | IGS ( <i>petN-psbM</i> )         | LSC             | 87230                  | IGS ( <i>petN-psbM</i> )         | LSC             | P           |
| 40                 | 26617                  | <i>ndhA</i> (intron)             | SSC             | 45878                  | IGS ( <i>trnV-GAC-rps7</i> )     | IR              | P           |
| 41                 | 33199                  | <i>ycf1</i>                      | SSC             | 33199                  | <i>ycf1</i>                      | SSC             | R           |
| 97                 | 100478                 | IGS ( <i>psaA-ycf3</i> )         | LSC             | 118250                 | IGS ( <i>psaI-ycf4</i> )         | LSC             | P           |
| 134                | 100441                 | IGS ( <i>psaA-ycf3</i> )         | LSC             | 118250                 | IGS ( <i>psaI-ycf4</i> )         | LSC             | P           |
| 169                | 100406                 | IGS ( <i>psaA-ycf3</i> )         | LSC             | 118250                 | IGS ( <i>psaI-ycf4</i> )         | LSC             | P           |

IGS (*rpl32-trnL-UAG*) means spacer between *rpl32* and *trnL-UAG*, P means palindromic match, F means forward (direct) match and R means reverse match

**Table S2E.** List of repeated sequences in the chloroplast genome of *Colobanthus pulvinatus*

| Repeat length (bp) | Strat site of repeat A | Repeat A location             | Repeat A region | Strat site of repeat B | Repeat B location             | Repeat B region | Repeat type |
|--------------------|------------------------|-------------------------------|-----------------|------------------------|-------------------------------|-----------------|-------------|
| 30                 | 52284                  | <i>ycf2</i>                   | IR              | 52326                  | <i>ycf2</i>                   | IR              | F           |
| 30                 | 52286                  | <i>ycf2</i>                   | IR              | 52304                  | <i>ycf2</i>                   | IR              | F           |
| 30                 | 66692                  | <i>trnS-GCU</i>               | LSC             | 93377                  | <i>trnS-UGA</i>               | LSC             | F           |
| 30                 | 66692                  | <i>trnS-GCU</i>               | LSC             | 102933                 | <i>trnS-GGA</i>               | LSC             | P           |
| 30                 | 74474                  | IGS ( <i>rps2-rpoC2</i> )     | LSC             | 129737                 | <i>clpP</i> (intron1)         | LSC             | C           |
| 30                 | 74605                  | IGS ( <i>rps2-rpoC2</i> )     | LSC             | 129736                 | <i>clpP</i> (intron1)         | LSC             | C           |
| 30                 | 74618                  | IGS ( <i>rps2-rpoC2</i> )     | LSC             | 110690                 | IGS ( <i>trnM-CAU-atpE</i> )  | LSC             | F           |
| 30                 | 87750                  | IGS ( <i>psbM-trnD-GUC</i> )  | LSC             | 129743                 | <i>clpP</i> (intron1)         | LSC             | F           |
| 30                 | 96539                  | <i>psaB</i>                   | LSC             | 98763                  | <i>psaA</i>                   | LSC             | F           |
| 30                 | 110686                 | IGS ( <i>trnM-CAU-atpE</i> )  | LSC             | 129736                 | <i>clpP</i> (intron1)         | LSC             | P           |
| 31                 | 52307                  | <i>ycf2</i>                   | IR              | 52331                  | <i>ycf2</i>                   | IR              | F           |
| 31                 | 63506                  | IGS ( <i>trnK-UUU-rps16</i> ) | LSC             | 63512                  | IGS ( <i>trnK-UUU-rps16</i> ) | LSC             | F           |
| 31                 | 68303                  | <i>trnG-UCC</i>               | LSC             | 94310                  | <i>trnG-GCC</i>               | LSC             | F           |
| 31                 | 74611                  | IGS ( <i>rps2-rpoC2</i> )     | LSC             | 110683                 | IGS ( <i>trnM-CAU-atpE</i> )  | LSC             | R           |
| 31                 | 87752                  | IGS ( <i>psbM-trnD-GUC</i> )  | LSC             | 87752                  | IGS ( <i>psbM-trnD-GUC</i> )  | LSC             | R           |
| 31                 | 87752                  | IGS ( <i>psbM-trnD-GUC</i> )  | LSC             | 110684                 | IGS ( <i>trnM-CAU-atpE</i> )  | LSC             | C           |
| 31                 | 87752                  | IGS ( <i>psbM-trnD-GUC</i> )  | LSC             | 110684                 | IGS ( <i>trnM-CAU-atpE</i> )  | LSC             | P           |
| 31                 | 87752                  | IGS ( <i>psbM-trnD-GUC</i> )  | LSC             | 129737                 | <i>clpP</i> (intron1)         | LSC             | R           |
| 31                 | 87752                  | IGS ( <i>psbM-trnD-GUC</i> )  | LSC             | 129737                 | <i>clpP</i> (intron1)         | LSC             | F           |
| 31                 | 87753                  | IGS ( <i>psbM-trnD-GUC</i> )  | LSC             | 110685                 | IGS ( <i>trnM-CAU-atpE</i> )  | LSC             | P           |
| 31                 | 87753                  | IGS ( <i>psbM-trnD-GUC</i> )  | LSC             | 110686                 | IGS ( <i>trnM-CAU-atpE</i> )  | LSC             | C           |
| 31                 | 110675                 | IGS ( <i>trnM-CAU-atpE</i> )  | LSC             | 129737                 | <i>clpP</i> (intron1)         | LSC             | C           |
| 31                 | 110683                 | IGS ( <i>trnM-CAU-atpE</i> )  | LSC             | 129735                 | <i>clpP</i> (intron1)         | LSC             | P           |
| 31                 | 110686                 | IGS ( <i>trnM-CAU-atpE</i> )  | LSC             | 110689                 | IGS ( <i>trnM-CAU-atpE</i> )  | LSC             | F           |
| 31                 | 110688                 | IGS ( <i>trnM-CAU-atpE</i> )  | LSC             | 129739                 | <i>clpP</i> (intron1)         | LSC             | P           |
| 31                 | 110691                 | IGS ( <i>trnM-CAU-atpE</i> )  | LSC             | 129745                 | <i>clpP</i> (intron1)         | LSC             | C           |
| 32                 | 74615                  | IGS ( <i>rps2-rpoC2</i> )     | LSC             | 110683                 | IGS ( <i>trnM-CAU-atpE</i> )  | LSC             | F           |

|     |        |                                  |     |        |                                  |     |   |
|-----|--------|----------------------------------|-----|--------|----------------------------------|-----|---|
| 32  | 110680 | IGS ( <i>trnM-CAU-atpE</i> )     | LSC | 129736 | <i>clpP</i> (intron1)            | LSC | C |
| 33  | 63506  | IGS ( <i>trnK-UUU-rps16</i> )    | LSC | 63510  | IGS ( <i>trnK-UUU-rps16</i> )    | LSC | F |
| 33  | 129741 | <i>clpP</i> (intron1)            | LSC | 129741 | <i>clpP</i> (intron1)            | LSC | R |
| 34  | 88936  | IGS ( <i>trnE-UCC-trnT-GGU</i> ) | LSC | 88968  | IGS ( <i>trnE-UCC-trnT-GGU</i> ) | LSC | F |
| 35  | 63506  | IGS ( <i>trnK-UUU-rps16</i> )    | LSC | 63508  | IGS ( <i>trnK-UUU-rps16</i> )    | LSC | F |
| 36  | 110683 | IGS ( <i>trnM-CAU-atpE</i> )     | LSC | 110683 | IGS ( <i>trnM-CAU-atpE</i> )     | LSC | R |
| 38  | 87120  | IGS ( <i>petN-psbM</i> )         | LSC | 87120  | IGS ( <i>petN-psbM</i> )         | LSC | P |
| 40  | 26587  | <i>ndhA</i> (intron)             | SSC | 45848  | IGS ( <i>trnV-GAC-rps7</i> )     | IR  | P |
| 41  | 33169  | <i>ycf1</i>                      | SSC | 33169  | <i>ycf1</i>                      | SSC | R |
| 97  | 100368 | IGS ( <i>psaA-ycf3</i> )         | LSC | 118146 | IGS ( <i>psaI-ycf4</i> )         | LSC | P |
| 134 | 100331 | IGS ( <i>psaA-ycf3</i> )         | LSC | 118146 | IGS ( <i>psaI-ycf4</i> )         | LSC | P |
| 169 | 100296 | IGS ( <i>psaA-ycf3</i> )         | LSC | 118146 | IGS ( <i>psaI-ycf4</i> )         | LSC | P |

IGS (*psbM-trnD-GUC*) means spacer between *psbM* and *trnD-GUC*, P means palindromic match, F means forward (direct) match, R means reverse match and C complementary match



**Table S2F.** List of repeated sequences in the chloroplast genome of *Colobanthus subulatus*

| Repeat length (bp) | Strat site of repeat A | Repeat A location            | Repeat A region | Strat site of repeat B | Repeat B location            | Repeat B region | Repeat type |
|--------------------|------------------------|------------------------------|-----------------|------------------------|------------------------------|-----------------|-------------|
| 30                 | 52284                  | <i>ycf2</i>                  | IR              | 52302                  | <i>ycf2</i>                  | IR              | F           |
| 30                 | 52282                  | <i>ycf2</i>                  | IR              | 52324                  | <i>ycf2</i>                  | IR              | F           |
| 30                 | 59167                  | IGS ( <i>trnH-GUG-psbA</i> ) | LSC             | 59199                  | IGS ( <i>trnH-GUG-psbA</i> ) | LSC             | P           |
| 30                 | 66912                  | <i>trnS-GCU</i>              | LSC             | 93571                  | <i>trnS-UGA</i>              | LSC             | F           |
| 30                 | 96733                  | <i>psaB</i>                  | LSC             | 98957                  | <i>psaA</i>                  | LSC             | F           |
| 30                 | 66912                  | <i>trnS-GCU</i>              | LSC             | 103120                 | <i>trnS-GGA</i>              | LSC             | P           |
| 30                 | 93571                  | <i>trnS-UGA</i>              | LSC             | 103120                 | <i>trnS-GGA</i>              | LSC             | P           |
| 30                 | 110857                 | IGS ( <i>trnM-CAU-atpE</i> ) | LSC             | 110858                 | IGS ( <i>trnM-CAU-atpE</i> ) | LSC             | F           |
| 30                 | 100630                 | IGS ( <i>psaA-ycf3</i> )     | LSC             | 118319                 | IGS ( <i>psaI-ycf4</i> )     | LSC             | P           |
| 31                 | 52305                  | <i>ycf2</i>                  | IR              | 52329                  | <i>ycf2</i>                  | IR              | F           |
| 31                 | 64323                  | <i>rps16</i> (intron)        | LSC             | 64415                  | <i>rps16</i> (intron)        | LSC             | F           |
| 31                 | 68528                  | <i>trnG-UCC</i>              | LSC             | 94504                  | <i>trnG-GCC</i>              | LSC             | F           |
| 38                 | 87341                  | IGS ( <i>petN-psbM</i> )     | LSC             | 87341                  | IGS ( <i>petN-psbM</i> )     | LSC             | P           |
| 40                 | 26604                  | <i>ndhA</i> (intron)         | SSC             | 45846                  | IGS ( <i>trnV-GAC-rps7</i> ) | IR              | P           |
| 41                 | 33172                  | <i>ycf1</i>                  | SSC             | 33172                  | <i>ycf1</i>                  | SSC             | R           |
| 42                 | 108814                 | IGS ( <i>ndhC-trnV-UAC</i> ) | LSC             | 108856                 | IGS ( <i>ndhC-trnV-UAC</i> ) | LSC             | F           |
| 47                 | 64326                  | <i>rps16</i> (intron)        | LSC             | 64395                  | <i>rps16</i> (intron)        | LSC             | F           |
| 70                 | 64326                  | <i>rps16</i> (intron)        | LSC             | 64372                  | <i>rps16</i> (intron)        | LSC             | F           |
| 93                 | 64326                  | <i>rps16</i> (intron)        | LSC             | 64349                  | <i>rps16</i> (intron)        | LSC             | F           |
| 134                | 100526                 | IGS ( <i>psaA-ycf3</i> )     | LSC             | 118319                 | IGS ( <i>psaI-ycf4</i> )     | LSC             | P           |
| 169                | 100491                 | IGS ( <i>psaA-ycf3</i> )     | LSC             | 118319                 | IGS ( <i>psaI-ycf4</i> )     | LSC             | P           |

IGS (*trnH-GUG-psbA*) means spacer between *trnH-GUG* and *psbA*, P means palindromic match, F means forward (direct) match and R means reverse match
