# Supplementary material for: Evolutionary dynamics of the chloroplast genome sequences of six Colobanthus species
Source: PubMed Central journal article supplement (PMC7359349; doi:10.1038/s41598-020-68563-5), 2020-07-13
Supplement: 41598_2020_68563_MOESM4_ESM.pdf [file 41598_2020_68563_MOESM4_ESM.pdf]

## **Evolutionary dynamics of the chloroplast genome sequences of six *Colobanthus* species**

Piotr Androsiuk\*<sup>1</sup>, Jan Paweł Jastrzębski<sup>1</sup>, Łukasz Pauksto<sup>1</sup>, Karol Makowczenko<sup>1</sup>, Adam Okorski<sup>2</sup>, Agnieszka Pszczółkowska<sup>2</sup>, Katarzyna Joanna Chwedorzewska<sup>3</sup>, Ryszard Górecki<sup>1</sup>, Irena Giełwanowska<sup>1</sup>

1. Department of Plant Physiology, Genetics and Biotechnology, Faculty of Biology and Biotechnology, University of Warmia and Mazury in Olsztyn, ul. M. Oczapowskiego 1A, 10-719 Olsztyn, Poland.
2. Department of Entomology, Phytopathology and Molecular Diagnostics, Faculty of Environmental Management and Agriculture, University of Warmia and Mazury in Olsztyn, ul. Prawocheńskiego 17, 10-720 Olsztyn, Poland.
3. Department of Agronomy, Warsaw University of Life Sciences-SGGW, ul. Nowoursynowska 166, 02-787 Warszawa, Poland.

**Table S3A.** Distribution of SSR in the *Colobanthus acicularis* cp genome.

| Type            | Repeat unit | Length (bp) | Start                 | End                  | Location                          |
|-----------------|-------------|-------------|-----------------------|----------------------|-----------------------------------|
| Mononucleotide  | A           | 12          | 31 124                | 31 135               | <i>ycf1</i>                       |
|                 |             | 14          | 32 047                | 32 060               | <i>ycf1</i>                       |
|                 |             | 12          | 60 849                | 60 860               | <i>trnK-UUU</i>                   |
|                 |             | 17          | 63 539                | 63 555               | IGS ( <i>trnK-UUU-rps16</i> )     |
|                 |             | 12          | 65 850                | 65 861               | IGS ( <i>trnQ-UUG-psbK</i> )      |
|                 |             | 15          | 65 896                | 65 910               | IGS ( <i>trnQ-UUG-psbK</i> )      |
|                 |             | 13          | 66 485                | 66 497               | IGS ( <i>psbK-psbI</i> )          |
|                 |             | 14          | 71 130                | 71 143               | <i>atpF</i> (intron)              |
|                 |             | 18          | 74 579                | 74 596               | IGS ( <i>rps2-rpoC2</i> )         |
|                 |             | 15          | 74 712                | 74 726               | IGS ( <i>rps2-rpoC2</i> )         |
|                 |             | 12          | 76 784                | 76 795               | <i>rpoC2</i>                      |
|                 |             | 23          | 87 819                | 87 841               | IGS ( <i>psbM-trnD-GUC</i> )      |
|                 |             | 17          | 89 208                | 89 224               | IGS ( <i>trnE-UUC-trnT-GGU</i> )  |
|                 |             | 13          | 90 483                | 90 495               | IGS ( <i>trnT-GGU-psbD</i> )      |
|                 |             | 16          | 93 106                | 93 121               | IGS ( <i>psbC-trnS-UGA</i> )      |
|                 |             | 13          | 106 246               | 106 258              | IGS ( <i>trnF-GAA-ndhJ</i> )      |
|                 |             | 14          | 114 876               | 114 889              | IGS ( <i>rbcL-accD</i> )          |
|                 |             | 13          | 123 654               | 123 666              | IGS ( <i>psbE-petL</i> )          |
|                 |             | 15          | 123 857               | 123 871              | IGS ( <i>psbE-petL</i> )          |
|                 |             | 12          | 127 886               | 127 897              | IGS ( <i>rpl20-rps12</i> )        |
| 24              | 129 670     | 129 693     | <i>clpP</i> (intron1) |                      |                                   |
| 12              | 133 706     | 133 717     | <i>petB</i> (intron)  |                      |                                   |
| Dinucleotide    | AT          | 13          | 63 527                | 63 539               | IGS ( <i>trnK-UUU-rps16</i> )     |
|                 |             | 12          | 117 293               | 117 304              | IGS ( <i>accD-psaI</i> )          |
| Trinucleotide   | AAT         | 12          | 20 533                | 20 544               | IGS ( <i>trnL-UAG-ccsA</i> )      |
|                 |             | 13          | 103 784               | 103 796              | IGS ( <i>rps4-trnT-UGU</i> )      |
|                 |             | 12          | 137 244               | 137 255              | IGS ( <i>rpoA-rps11</i> )         |
| Tetranucleotide | AAAT        | 12          | 18 715                | 18 726               | IGS ( <i>ndhF-rpl32</i> )         |
|                 | AATT        | 12          | 27 329                | 27 340               | <i>ndhA</i> (intron)              |
|                 | ACCT        | 14          | 38 520                | 38 533               | <i>rrn23</i>                      |
|                 | AATT        | 12          | 63 758                | 63 769               | IGS ( <i>trnK-UUU-rps16</i> )     |
|                 | AATG        | 13          | 68 446                | 68 458               | IGS ( <i>trnG-UCC-trnR-UCU</i> )  |
|                 | AAAC        | 12          | 68 883                | 68 894               | <i>atpA</i>                       |
|                 | AAGG        | 13          | 71 794                | 71 806               | IGS ( <i>atpF-atpH</i> )          |
|                 | AAAT        | 16          | 87 164                | 87 179               | IGS ( <i>petN-psbM</i> )          |
|                 | AAAC        | 13          | 93 968                | 93 980               | IGS ( <i>psbZ-trnG-GCC</i> )      |
|                 | AACT        | 13          | 100 123               | 100 135              | IGS ( <i>psaA-ycf3</i> )          |
|                 | AATT        | 12          | 117 617               | 117 628              | IGS ( <i>accD-psaI</i> )          |
|                 | AAAG        | 12          | 128 669               | 128 680              | <i>clpP</i> (intron2)             |
| AAAT            | 12          | 135 112     | 135 123               | <i>petD</i> (intron) |                                   |
| Pentanucleotide | AAATT       | 18          | 19 803                | 19 820               | IGS ( <i>rpl32-trnL-UAG</i> )     |
|                 | AAATC       | 16          | 24 409                | 24 424               | IGS ( <i>ndhE-ndhG</i> )          |
|                 | AATCT       | 15          | 123 764               | 123 778              | IGS ( <i>psbE-petL</i> )          |
| Hexanucleotide  | AATACT      | 25          | 94 365                | 94 389               | IGS ( <i>trnG-GCC-trnfM-CAU</i> ) |

IGS (*trnK-UUU-rps16*) means spacer between *trnK-UUU* and *rps16*

**Table S3B.** Distribution of SSR in the *Colobanthus affinis* cp genome.

| Type            | Repeat unit | Length (bp) | Start                | End                  | Location                         |
|-----------------|-------------|-------------|----------------------|----------------------|----------------------------------|
| Mononucleotide  | A           | 13          | 16 448               | 16 460               | <i>ndhF</i>                      |
|                 |             | 12          | 31 163               | 31 174               | <i>ycf1</i>                      |
|                 |             | 13          | 60 894               | 60 906               | <i>trnK-UUU</i> (intron)         |
|                 |             | 16          | 63 591               | 63 606               | IGS ( <i>trnK-UUU-rps16</i> )    |
|                 |             | 20          | 65 946               | 65 965               | IGS ( <i>trnQ-UUG-psbK</i> )     |
|                 |             | 13          | 66 540               | 66 552               | IGS ( <i>psbK-psbI</i> )         |
|                 |             | 18          | 74 630               | 74 647               | IGS ( <i>rps2-rpoC2</i> )        |
|                 |             | 15          | 74 763               | 74 777               | IGS ( <i>rps2-rpoC2</i> )        |
|                 |             | 12          | 76 835               | 76 846               | <i>rpoC2</i>                     |
|                 |             | 18          | 89 308               | 89 325               | IGS ( <i>trnE-UUC-trnT-GGU</i> ) |
|                 |             | 12          | 90 745               | 90 756               | IGS ( <i>trnT-GGU-psbD</i> )     |
|                 |             | 13          | 93 367               | 93 379               | IGS ( <i>psbC-trnS-UGA</i> )     |
|                 |             | 14          | 106 515              | 106 528              | IGS ( <i>trnF-GAA-ndhJ</i> )     |
|                 |             | 14          | 115 142              | 115 155              | IGS ( <i>rbcL-accD</i> )         |
|                 |             | 14          | 124 100              | 124 113              | IGS ( <i>psbE-petL</i> )         |
|                 |             | 12          | 125 281              | 125 292              | IGS ( <i>trnP-UGG-psaJ</i> )     |
|                 |             | 12          | 128 147              | 128 158              | IGS ( <i>rpl20-clpP</i> )        |
|                 |             | 21          | 129 933              | 129 953              | <i>clpP</i> (intron1)            |
| 13              | 133 963     | 133 975     | <i>petB</i> (intron) |                      |                                  |
| Dinucleotide    | AT          | 19          | 63 573               | 63 591               | IGS ( <i>trnK-UUU-rps16</i> )    |
|                 |             | 21          | 66 709               | 66 729               | IGS ( <i>psbI-trnS-GCU</i> )     |
|                 |             | 12          | 117 559              | 117 57               | IGS ( <i>accD-psaI</i> )         |
| Trinucleotide   | AAT         | 12          | 20 579               | 20 590               | IGS ( <i>trnL-UAG-ccsA</i> )     |
|                 |             | 13          | 104 064              | 104 076              | IGS ( <i>rps4-trnT-UGU</i> )     |
|                 |             | 12          | 137 508              | 137 519              | IGS ( <i>rpoA-rps11</i> )        |
| Tetranucleotide | AAAT        | 12          | 18 722               | 18 733               | IGS ( <i>ndhF-rpl32</i> )        |
|                 | AATT        | 12          | 27 367               | 27 378               | <i>ndhA</i> (intron)             |
|                 | ACCT        | 14          | 38 560               | 38 573               | <i>rrn23</i>                     |
|                 | AATT        | 12          | 63 811               | 63 822               | IGS ( <i>trnK-UUU-rps16</i> )    |
|                 | AAAC        | 12          | 68 942               | 68 953               | <i>atpA</i>                      |
|                 | AAGG        | 13          | 71 854               | 71 866               | IGS ( <i>atpF-atpH</i> )         |
|                 | AAAT        | 12          | 87 240               | 87 251               | IGS ( <i>petN-psbM</i> )         |
|                 | AAAC        | 13          | 94 225               | 94 237               | IGS ( <i>psbZ-trnG-GCC</i> )     |
|                 | AACT        | 13          | 100 407              | 100 419              | IGS ( <i>psaA-ycf3</i> )         |
|                 | AATT        | 12          | 117 883              | 117 894              | IGS ( <i>accD-psaI</i> )         |
|                 | AAAG        | 12          | 128 930              | 128 941              | <i>clpP</i> (intron2)            |
| AAAT            | 12          | 135 376     | 135 387              | <i>petD</i> (intron) |                                  |
| Pentanucleotide | AAATC       | 16          | 24 429               | 24 444               | IGS ( <i>ndhE-ndhG</i> )         |
|                 | AATCT       | 15          | 124 007              | 124 021              | IGS ( <i>psbE-petL</i> )         |

IGS (*trnK-UUU-rps16*) means spacer between *trnK-UUU* and *rps16*

**Table S3C.** Distribution of SSR in the *Colobanthus lycopodioides* cp genome.

| Type            | Repeat unit | Length (bp) | Start                 | End                  | Location                         |
|-----------------|-------------|-------------|-----------------------|----------------------|----------------------------------|
| Mononucleotide  | A           | 15          | 18 781                | 18 795               | IGS ( <i>ndhF-rpl32</i> )        |
|                 |             | 12          | 31 083                | 31 094               | <i>ycf1</i>                      |
|                 |             | 13          | 60 790                | 60 802               | <i>trnK-UUU</i> (intron)         |
|                 |             | 14          | 63 535                | 63 548               | IGS ( <i>trnK-UUU-rps16</i> )    |
|                 |             | 14          | 63 627                | 63 640               | IGS ( <i>trnK-UUU-rps16</i> )    |
|                 |             | 14          | 65 932                | 65 945               | IGS ( <i>trnQ-UUG-psbK</i> )     |
|                 |             | 14          | 65 980                | 65 993               | IGS ( <i>trnQ-UUG-psbK</i> )     |
|                 |             | 12          | 66 570                | 66 581               | IGS ( <i>psbK-psbI</i> )         |
|                 |             | 13          | 68 787                | 68 799               | IGS ( <i>trnR-UCU-atpA</i> )     |
|                 |             | 16          | 71 214                | 71 229               | <i>atpF</i> (intron)             |
|                 |             | 12          | 71 284                | 71 295               | <i>atpF</i> (intron)             |
|                 |             | 14          | 74 747                | 74 760               | IGS ( <i>rps2-rpoC2</i> )        |
|                 |             | 17          | 74 879                | 74 895               | IGS ( <i>rps2-rpoC2</i> )        |
|                 |             | 12          | 76 944                | 76 955               | <i>rpoC2</i>                     |
|                 |             | 13          | 89 485                | 89 497               | IGS ( <i>trnE-UUC-trnT-GGU</i> ) |
|                 |             | 12          | 90 912                | 90 923               | IGS ( <i>trnT-GGU-psbD</i> )     |
|                 |             | 14          | 93 534                | 93 547               | IGS ( <i>psbC-trnS-UGA</i> )     |
|                 |             | 12          | 93 985                | 93 996               | IGS ( <i>trnS-UGA-psbZ</i> )     |
|                 |             | 12          | 102 560               | 102 571              | IGS ( <i>ycf3-trnS-GGA</i> )     |
|                 |             | 12          | 109 212               | 109 223              | IGS ( <i>ndhC-trnV-UAC</i> )     |
|                 |             | 18          | 122 231               | 122 248              | IGS ( <i>petA-psbJ</i> )         |
|                 |             | 16          | 124 283               | 124 298              | IGS ( <i>psbE-petL</i> )         |
|                 |             | 12          | 128 306               | 128 317              | IGS ( <i>rpl20-clpP</i> )        |
| 14              | 129 942     | 129 955     | <i>clpP</i> (intron1) |                      |                                  |
| 22              | 130 097     | 130 118     | <i>clpP</i> (intron1) |                      |                                  |
| 12              | 134 121     | 134 132     | <i>petB</i> (intron)  |                      |                                  |
| Dinucleotide    | AT          | 19          | 63 517                | 63 535               | IGS ( <i>trnK-UUU-rps16</i> )    |
|                 |             | 12          | 117 703               | 117 714              | IGS ( <i>accD-psaI</i> )         |
| Trinucleotide   | AAT         | 12          | 20 526                | 20 537               | IGS ( <i>trnL-UAG-ccsA</i> )     |
|                 |             | 13          | 104 198               | 104 210              | IGS ( <i>rps4-trnT-UGU</i> )     |
|                 |             | 12          | 137 659               | 137 670              | IGS ( <i>rpoA-rps11</i> )        |
| Tetranucleotide | AAAT        | 12          | 18 721                | 18 732               | IGS ( <i>ndhF-rpl32</i> )        |
|                 | AATT        | 12          | 27 287                | 27 298               | <i>ndhA</i> (intron)             |
|                 | ACCT        | 14          | 38 479                | 38 492               | <i>rrn23</i>                     |
|                 | AATT        | 12          | 63 849                | 63 860               | <i>rps16</i>                     |
|                 | AATG        | 13          | 68 521                | 68 533               | IGS ( <i>trnG-UCC-trnR-UCU</i> ) |
|                 | AAAC        | 12          | 68 960                | 68 971               | <i>atpA</i>                      |
|                 | AAGG        | 13          | 71 949                | 71 961               | IGS ( <i>atpF-atpH</i> )         |
|                 | AAAT        | 12          | 87 356                | 87 367               | IGS ( <i>petN-psbM</i> )         |
|                 | AAAC        | 13          | 94 404                | 94 416               | IGS ( <i>psbZ-trnG-GCC</i> )     |
|                 | AACT        | 13          | 100 535               | 100 547              | IGS ( <i>psaA-ycf3</i> )         |
|                 | AAAT        | 15          | 111 001               | 111 015              | IGS ( <i>trnM-CAU-atpE</i> )     |
|                 | AATT        | 12          | 118 027               | 118 038              | IGS ( <i>accD-psaI</i> )         |
|                 | AAAG        | 12          | 129 089               | 129 100              | <i>clpP</i> (intron2)            |
| AAAT            | 12          | 135 527     | 135 538               | <i>petD</i> (intron) |                                  |
| Pentanucleotide | AATTC       | 15          | 24 370                | 24 384               | IGS ( <i>ndhE-ndhG</i> )         |

|  |       |    |         |         |                          |
|--|-------|----|---------|---------|--------------------------|
|  | AATCT | 15 | 124 190 | 124 204 | IGS ( <i>psbE-petL</i> ) |
|--|-------|----|---------|---------|--------------------------|

IGS (*tmK-UUU-rps16*) means spacer between *tmK-UUU* and *rps16*

**Table S3D.** Distribution of SSR in the *Colobanthus nivicola* cp genome.

| Type            | Repeat unit | Length (bp)  | Start   | End     | Location                         |
|-----------------|-------------|--------------|---------|---------|----------------------------------|
| Mononucleotide  | A           | 13           | 16 453  | 16 465  | <i>ndhF</i>                      |
|                 |             | 12           | 18 787  | 18 798  | IGS ( <i>ndhF-rpl32</i> )        |
|                 |             | 12           | 31 118  | 31 129  | <i>ycf1</i>                      |
|                 |             | 12           | 32 338  | 32 349  | <i>ycf1</i>                      |
|                 |             | 15           | 60 855  | 60 869  | <i>trnK-UUU</i>                  |
|                 |             | 19           | 63 553  | 63 571  | IGS ( <i>trnK-UUU-rps16</i> )    |
|                 |             | 15           | 63 639  | 63 653  | IGS ( <i>trnK-UUU-rps16</i> )    |
|                 |             | 16           | 65 913  | 65 928  | IGS ( <i>trnQ-UUG-psbK</i> )     |
|                 |             | 12           | 66 503  | 66 514  | IGS ( <i>psbK-psbI</i> )         |
|                 |             | 12           | 67 187  | 67 198  | IGS ( <i>trnS-GCU-trnG-UCC</i> ) |
|                 |             | 21           | 74 593  | 74 613  | IGS ( <i>rps2-rpoC2</i> )        |
|                 |             | 17           | 74 729  | 74 745  | IGS ( <i>rps2-rpoC2</i> )        |
|                 |             | 12           | 76 803  | 76 814  | <i>rpoC2</i>                     |
|                 |             | 15           | 87 871  | 87 885  | IGS ( <i>psbM-trnD-GUC</i> )     |
|                 |             | 13           | 89 277  | 89 289  | IGS ( <i>trnE-UUC-trnT-GGU</i> ) |
|                 |             | 13           | 90 703  | 90 715  | IGS ( <i>trnT-GGU-psbD</i> )     |
|                 |             | 14           | 93 326  | 93 339  | IGS ( <i>psbC-trnS-UGA</i> )     |
|                 |             | 14           | 106 471 | 106 484 | IGS ( <i>trnF-GAA-ndhJ</i> )     |
|                 |             | 15           | 110 797 | 110 811 | IGS ( <i>trnM-CAU-atpE</i> )     |
|                 |             | Dinucleotide | AT      | 17      | 63 537                           |
| 12              | 117 513     |              |         | 117 524 | IGS ( <i>accD-psaI</i> )         |
| Trinucleotide   | AAT         | 12           | 20 555  | 20 566  | IGS ( <i>trnL-UAG-ccsA</i> )     |
|                 |             | 13           | 104 019 | 104 031 | IGS ( <i>rps4-trnT-UGU</i> )     |
|                 |             | 12           | 137 403 | 137 414 | IGS ( <i>rpoA-rps11</i> )        |
| Tetranucleotide | AAAT        | 12           | 18 727  | 18 738  | IGS ( <i>ndhF-rpl32</i> )        |
|                 | AATT        | 12           | 27 322  | 27 333  | <i>ndhA</i>                      |
|                 | ACCT        | 14           | 38 514  | 38 527  | <i>rrn23</i>                     |
|                 | AATT        | 12           | 63 855  | 63 866  | IGS ( <i>trnK-UUU-rps16</i> )    |
|                 | AAAC        | 12           | 68 895  | 68 906  | <i>atpA</i>                      |
|                 | AAGG        | 13           | 71 808  | 71 820  | IGS ( <i>atpF-atpH</i> )         |
|                 | AAAT        | 12           | 87 207  | 87 218  | IGS ( <i>petN-psbM</i> )         |
|                 | AAAC        | 13           | 94 185  | 94 197  | IGS ( <i>psbZ-trnG-GCC</i> )     |
|                 | AACT        | 13           | 100 360 | 100 372 | IGS ( <i>psaA-ycf3</i> )         |
|                 | AATT        | 12           | 117 837 | 117 848 | IGS ( <i>accD-psaI</i> )         |
|                 | AAAG        | 12           | 128 880 | 128 891 | <i>clpP</i> (intron2)            |
| Pentanucleotide | AAATT       | 18           | 19 816  | 19 833  | IGS ( <i>rpl32-trnL-UAG</i> )    |
|                 | AAATC       | 16           | 24 405  | 24 420  | IGS ( <i>ndhE-ndhG</i> )         |
|                 | AATCT       | 15           | 123 965 | 123 979 | IGS ( <i>psbE-petL</i> )         |
| Hexanucleotide  | AAGAAT      | 19           | 41 278  | 41 296  | IGS ( <i>trnA-UGC-trnI-GAU</i> ) |

IGS (*trnK-UUU-rps16*) means spacer between *trnK-UUU* and *rps16*

**Table S3E.** Distribution of SSR in the *Colobanthus pulvinatus* cp genome.

| Type            | Repeat unit | Length (bp) | Start                     | End                  | Location                         |
|-----------------|-------------|-------------|---------------------------|----------------------|----------------------------------|
| Mononucleotide  | A           | 13          | 16 444                    | 16 456               | <i>ndhF</i>                      |
|                 |             | 12          | 18 778                    | 18 789               | IGS ( <i>ndhF-rpl32</i> )        |
|                 |             | 12          | 31 088                    | 31 099               | <i>ycf1</i>                      |
|                 |             | 12          | 32 308                    | 32 319               | <i>ycf1</i>                      |
|                 |             | 15          | 60 825                    | 60 839               | <i>trnK-UUU</i> (intron)         |
|                 |             | 15          | 63 529                    | 63 543               | IGS ( <i>trnK-UUU-rps16</i> )    |
|                 |             | 16          | 65 803                    | 65 818               | IGS ( <i>trnQ-UUG-psbK</i> )     |
|                 |             | 12          | 66 393                    | 66 404               | IGS ( <i>psbK-psbI</i> )         |
|                 |             | 12          | 67 077                    | 67 088               | IGS ( <i>trnS-GCU-trnG-UCC</i> ) |
|                 |             | 21          | 74 483                    | 74 503               | IGS ( <i>rps2-rpoC2</i> )        |
|                 |             | 17          | 74 619                    | 74 635               | IGS ( <i>rps2-rpoC2</i> )        |
|                 |             | 12          | 76 693                    | 76 704               | <i>rpoC2</i>                     |
|                 |             | 15          | 87 761                    | 87 775               | IGS ( <i>psbM-trnD-GUC</i> )     |
|                 |             | 13          | 89 167                    | 89 179               | IGS ( <i>trnE-UUC-trnT-GGU</i> ) |
|                 |             | 13          | 90 593                    | 90 605               | IGS ( <i>trnT-GGU-psbD</i> )     |
|                 |             | 14          | 93 216                    | 93 229               | IGS ( <i>psbC-trnS-UGA</i> )     |
|                 |             | 14          | 106 361                   | 106 374              | IGS ( <i>trnF-GAA-ndhJ</i> )     |
|                 |             | 21          | 110 687                   | 110 707              | IGS ( <i>trnM-CAU-atpE</i> )     |
|                 |             | 13          | 114 993                   | 115 005              | IGS ( <i>rbcL-accD</i> )         |
|                 |             | 14          | 123 954                   | 123 967              | IGS ( <i>psbE-petL</i> )         |
| 13              | 127 963     | 127 975     | IGS ( <i>rpl20-clpP</i> ) |                      |                                  |
| 23              | 129 746     | 129 768     | <i>clpP</i> (intron1)     |                      |                                  |
| 14              | 133 780     | 133 793     | <i>petB</i> (intron)      |                      |                                  |
| Dinucleotide    | AT          | 23          | 63 507                    | 63 529               | IGS ( <i>trnK-UUU-rps16</i> )    |
|                 |             | 12          | 117 409                   | 117 420              | IGS ( <i>accD-psaI</i> )         |
| Trinucleotide   | AAT         | 12          | 20 525                    | 20 536               | IGS ( <i>trnL-UAG-ccsA</i> )     |
|                 |             | 13          | 103 909                   | 103 921              | IGS ( <i>rps4-trnT-UGU</i> )     |
|                 |             | 12          | 137 326                   | 137 337              | <i>rpoA</i>                      |
| Tetranucleotide | AAAT        | 12          | 18 718                    | 18 729               | IGS ( <i>ndhF-rpl32</i> )        |
|                 | AATT        | 12          | 27 292                    | 27 303               | <i>ndhA</i> (intron)             |
|                 | ACCT        | 14          | 38 484                    | 38 497               | <i>rrn23</i>                     |
|                 | AATT        | 12          | 63 745                    | 63 756               | IGS ( <i>trnK-UUU-rps16</i> )    |
|                 | AAAC        | 12          | 68 785                    | 68 796               | <i>atpA</i>                      |
|                 | AAGG        | 13          | 71 698                    | 71 710               | IGS ( <i>atpF-atpH</i> )         |
|                 | AAAT        | 12          | 87 097                    | 87 108               | IGS ( <i>petN-psbM</i> )         |
|                 | AAAC        | 13          | 94 075                    | 94 087               | IGS ( <i>psbZ-trnG-GCC</i> )     |
|                 | AACT        | 13          | 100 250                   | 100 262              | IGS ( <i>psaA-ycf3</i> )         |
|                 | AATT        | 12          | 117 733                   | 117 744              | IGS ( <i>accD-psaI</i> )         |
|                 | AAAG        | 12          | 128 747                   | 128 758              | <i>clpP</i> (intron2)            |
| AAAT            | 12          | 135 194     | 135 205                   | <i>petD</i> (intron) |                                  |
| Pentanucleotide | AAATT       | 18          | 19 807                    | 19 824               | IGS ( <i>rpl32-trnL-UAG</i> )    |
|                 | AAATC       | 16          | 24 375                    | 24 390               | IGS ( <i>ndhE-ndhG</i> )         |
|                 | AATCT       | 15          | 123 861                   | 123 875              | IGS ( <i>psbE-petL</i> )         |
| Hexanucleotide  | AAGAAT      | 19          | 41 248                    | 41 266               | IGS ( <i>trnA-UGC-trnI-GAU</i> ) |

IGS (*trnK-UUU-rps16*) means spacer between *trnK-UUU* and *rps16*

**Table S3F.** Distribution of SSR in the *Colobanthus subulatus* cp genome.

| Type            | Repeat unit | Length (bp) | Start                 | End                  | Location                         |
|-----------------|-------------|-------------|-----------------------|----------------------|----------------------------------|
| Mononucleotide  | A           | 13          | 16 449                | 16 461               | <i>ndhF</i>                      |
|                 |             | 12          | 31 091                | 31 102               | <i>ycf1</i>                      |
|                 |             | 12          | 63 503                | 63 514               | IGS ( <i>trnK-UUU-rps16</i> )    |
|                 |             | 12          | 63 582                | 63 593               | IGS ( <i>trnK-UUU-rps16</i> )    |
|                 |             | 15          | 66 030                | 66 044               | IGS ( <i>trnQ-UUG-psbK</i> )     |
|                 |             | 14          | 66 620                | 66 633               | IGS ( <i>psbK-psbI</i> )         |
|                 |             | 15          | 74 836                | 74 850               | IGS ( <i>atpI-rps2</i> )         |
|                 |             | 12          | 76 908                | 76 919               | <i>rpoC2</i>                     |
|                 |             | 14          | 87 983                | 87 996               | IGS ( <i>psbM-trnD-GUC</i> )     |
|                 |             | 16          | 88 162                | 88 177               | IGS ( <i>psbM-trnD-GUC</i> )     |
|                 |             | 16          | 89 360                | 89 375               | IGS ( <i>trnE-UUC-trnT-GGU</i> ) |
|                 |             | 12          | 104 721               | 104 732              | IGS ( <i>trnT-UGU-trnL-UAA</i> ) |
|                 |             | 15          | 106 496               | 106 510              | IGS ( <i>trnF-GAA-ndhJ</i> )     |
|                 |             | 18          | 110 858               | 110 875              | IGS ( <i>trnM-CAU-atpE</i> )     |
|                 |             | 13          | 115 156               | 115 168              | IGS ( <i>rbcL-accD</i> )         |
|                 |             | 20          | 124 134               | 124 153              | IGS ( <i>psbE-petL</i> )         |
|                 |             | 17          | 124 542               | 124 558              | IGS ( <i>petL-petG</i> )         |
| 15              | 129 919     | 129 933     | <i>clpP</i> (intron1) |                      |                                  |
| 13              | 133 944     | 133 956     | <i>petB</i> (intron)  |                      |                                  |
| Dinucleotide    | AT          | 13          | 63 491                | 63 503               | IGS ( <i>trnK-UUU-rps16</i> )    |
|                 | AT          | 15          | 66 790                | 66 804               | IGS ( <i>psbI-trnS-GCU</i> )     |
|                 | AT          | 12          | 117 582               | 117 593              | IGS ( <i>accD-psaI</i> )         |
| Trinucleotide   | AAT         | 12          | 20 530                | 20 541               | IGS ( <i>trnL-UAG-ccsA</i> )     |
|                 | AAT         | 13          | 104 096               | 104 108              | IGS ( <i>rps4-trnT-UGU</i> )     |
|                 | AAT         | 12          | 137 483               | 137 494              | IGS ( <i>rpoA-rps11</i> )        |
| Tetranucleotide | AAAT        | 12          | 18 723                | 18 734               | IGS ( <i>ndhF-rpl32</i> )        |
|                 | AATT        | 12          | 27 295                | 27 306               | <i>ndhA</i> (intron)             |
|                 | ACCT        | 14          | 38 488                | 38 501               | <i>rrn23</i>                     |
|                 | AATT        | 12          | 63 801                | 63 812               | <i>rps16</i>                     |
|                 | AATG        | 13          | 68 577                | 68 589               | IGS ( <i>trnG-UCC-trnR-UCU</i> ) |
|                 | AAAC        | 12          | 69 012                | 69 023               | <i>atpA</i>                      |
|                 | AAGG        | 13          | 71 925                | 71 937               | IGS ( <i>atpF-atpH</i> )         |
|                 | AAAC        | 13          | 94 269                | 94 281               | IGS ( <i>psbZ-trnG-GCC</i> )     |
|                 | AACT        | 13          | 100 444               | 100 456              | IGS ( <i>psaA-ycf3</i> )         |
|                 | AATT        | 12          | 117 906               | 117 917              | IGS ( <i>accD-psaI</i> )         |
|                 | AAAG        | 12          | 128 917               | 128 928              | <i>clpP</i> (intron2)            |
| AAAT            | 12          | 135 351     | 135 362               | <i>petD</i> (intron) |                                  |
| Pentanucleotide | AATCC       | 18          | 23 776                | 23 793               | IGS ( <i>psaC-ndhE</i> )         |
|                 | AAATT       | 17          | 19 810                | 19 826               | IGS ( <i>rpl32-trnL-UAG</i> )    |
|                 | AAATC       | 16          | 24 385                | 24 400               | IGS ( <i>ndhE-ndhG</i> )         |
|                 | AATCT       | 15          | 124 041               | 124 055              | IGS ( <i>psbE-petL</i> )         |

IGS (*trnK-UUU-rps16*) means spacer between *trnK-UUU* and *rps16*
