# Supplementary material for: Evolutionary dynamics of the chloroplast genome sequences of six Colobanthus species
Source: PubMed Central journal article supplement (PMC7359349; doi:10.1038/s41598-020-68563-5), 2020-07-13
Supplement: 41598_2020_68563_MOESM7_ESM.pdf [file 41598_2020_68563_MOESM7_ESM.pdf]

## **Evolutionary dynamics of the chloroplast genome sequences of six *Colobanthus* species**

Piotr Androsiuk\*<sup>1</sup>, Jan Paweł Jastrzębski<sup>1</sup>, Łukasz Pauksto<sup>1</sup>, Karol Makowczenko<sup>1</sup>, Adam Okorski<sup>2</sup>, Agnieszka Pszczółkowska<sup>2</sup>, Katarzyna Joanna Chwedorzewska<sup>3</sup>, Ryszard Górecki<sup>1</sup>, Irena Giełwanowska<sup>1</sup>

1. Department of Plant Physiology, Genetics and Biotechnology, Faculty of Biology and Biotechnology, University of Warmia and Mazury in Olsztyn, ul. M. Oczapowskiego 1A, 10-719 Olsztyn, Poland.
2. Department of Entomology, Phytopathology and Molecular Diagnostics, Faculty of Environmental Management and Agriculture, University of Warmia and Mazury in Olsztyn, ul. Prawocheńskiego 17, 10-720 Olsztyn, Poland.
3. Department of Agronomy, Warsaw University of Life Sciences-SGGW, ul. Nowoursynowska 166, 02-787 Warszawa, Poland.

**Table S6.** RNA editing sites predicted in the CP genomes of eight *Colobanthus* species using the PREP program.

| Gene        | Nucleotide position | Amino acid position | Codon change | Amino acid change | Score |
|-------------|---------------------|---------------------|--------------|-------------------|-------|
| <i>accD</i> | 74                  | 25                  | ACG => ATG   | T => M            | 1.00  |
|             | 229                 | 77                  | CCT => TCT   | P => S            | 1.00  |
| <i>atpA</i> | 914                 | 305                 | TCA => TTA   | S => L            | 1.00  |
|             | 1270                | 424                 | CCC => TCC   | P => S            | 1.00  |
| <i>atpB</i> | 419                 | 140                 | ACA => ATA   | T => I            | 0.86  |
| <i>atpF</i> | –                   | –                   | –            | –                 | –     |
| <i>atpI</i> | –                   | –                   | –            | –                 | –     |
| <i>ccsA</i> | –                   | –                   | –            | –                 | –     |
| <i>clpP</i> | 559                 | 187                 | CAT => TAT   | H => Y            | 1.00  |
| <i>matK</i> | 637                 | 213                 | CAT => TAT   | H => Y            | 1.00  |
| <i>ndhA</i> | 566                 | 189                 | TCA => TTA   | S => L            | 1.00  |
|             | 1073                | 358                 | TCC => TTC   | S => F            | 1.00  |
| <i>ndhB</i> | 149                 | 50                  | TCA => TTA   | S => L            | 1.00  |
|             | 467 <sup>s</sup>    | 156 <sup>s</sup>    | CCA => CTA   | P => L            | 1.00  |
|             | 542                 | 181                 | ACG => ATG   | T => M            | 1.00  |
|             | 586                 | 196                 | CAT => TAT   | H => Y            | 1.00  |
|             | 611                 | 204                 | TCA => TTA   | S => L            | 0.80  |
|             | 737                 | 246                 | CCA => CTA   | P => L            | 1.00  |
|             | 746                 | 249                 | TCT => TTT   | S => F            | 1.00  |
|             | 830                 | 277                 | TCA => TTA   | S => L            | 1.00  |
|             | 836                 | 279                 | TCA => TTA   | S => L            | 1.00  |
|             | 1481                | 494                 | CCA => CTA   | P => L            | 1.00  |
| <i>ndhD</i> | 29                  | 10                  | ACG => ATG   | T => M            | 1.00  |
|             | 53                  | 18                  | ACA => ATA   | T => I            | 1.00  |
|             | 94                  | 32                  | CTT => TTT   | L => F            | 1.00  |
|             | 410                 | 137                 | TCA => TTA   | S => L            | 1.00  |
|             | 637                 | 213                 | CCG => TCG   | P => S            | 1.00  |
|             | 1325                | 442                 | TCA => TTA   | S => L            | 0.80  |
|             | 1337                | 446                 | TCA => TTA   | S => L            | 0.80  |
|             | 1366                | 456                 | CTT => TTT   | L => F            | 0.80  |
|             | 1424                | 475                 | ACT => ATT   | T => I            | 1.00  |
|             | 1487                | 496                 | GCT => GTT   | A => V            | 0.80  |
| <i>ndhF</i> | 290                 | 97                  | TCA => TTA   | S => L            | 1.00  |
|             | 586                 | 196                 | CTT => TTT   | L => F            | 0.80  |
|             | 1769 <sup>ε</sup>   | 590 <sup>ε</sup>    | CCT => CTT   | P => L            | 0.80  |
| <i>ndhG</i> | 166                 | 56                  | CAT => TAT   | H => Y            | 0.80  |

|              |            |          |            |        |      |
|--------------|------------|----------|------------|--------|------|
|              | 250        | 84       | CCA => TCA | P => S | 1.00 |
|              | 314        | 105      | ACA => ATA | T => I | 0.80 |
| <i>petB</i>  | 418        | 140      | CGG => TGG | R => W | 1.00 |
| <i>petD</i>  | –          | –        | –          | –      | –    |
| <i>petG</i>  | –          | –        | –          | –      | –    |
| <i>petL</i>  | –          | –        | –          | –      | –    |
| <i>psaB</i>  | –          | –        | –          | –      | –    |
| <i>psaI</i>  | 28         | 10       | CTT => TTT | L => F | 0.86 |
| <i>psbB</i>  | –          | –        | –          | –      | –    |
| <i>psbE</i>  | –          | –        | –          | –      | –    |
| <i>psbF</i>  | –          | –        | –          | –      | –    |
| <i>psbL</i>  | 17         | 6        | ACG => ATG | T => M | 1.00 |
| <i>rpl2</i>  | –          | –        | –          | –      | –    |
| <i>rpl20</i> | –          | –        | –          | –      | –    |
| <i>rpoA</i>  | –          | –        | –          | –      | –    |
| <i>rpoB</i>  | 169        | 57       | CAT => TAT | H => Y | 1.00 |
|              | 473        | 158      | TCA => TTA | S => L | 0.86 |
|              | 551        | 184      | TCA => TTA | S => L | 1.00 |
|              | 566        | 189      | TCG => TTG | S => L | 1.00 |
|              | 2033/2036* | 678/679* | GCA => GTA | A => V | 1.00 |
|              | 2177/2180* | 726/727* | GCG => GTG | A => V | 1.00 |
| <i>rpoC1</i> | 41         | 14       | TCA => TTA | S => L | 1.00 |
| <i>rpoC2</i> | 1493       | 498      | ACG => ATG | T => M | 0.86 |
|              | 2278       | 760      | CGG => TGG | R => W | 1.00 |
| <i>rps14</i> | 80         | 27       | TCA => TTA | S => L | 1.00 |
| <i>rps16</i> | –          | –        | –          | –      | –    |
| <i>rps2</i>  | 248        | 83       | TCA => TTA | S => L | 1.00 |
| <i>rps8</i>  | –          | –        | –          | –      | –    |
| <i>ycf3</i>  | –          | –        | –          | –      | –    |

<sup>§</sup> - RNA editing site not observed for *C. lycopodioides*;

<sup>‡</sup> - RNA editing site not observed for *C. acicularis*;

\*- RNA editing sites with shifted position revealed for *C. quitensis*
